# Supplementary material
Source: PubMed Central journal article supplement (PMC3319304)
Supplement: NIHMS255761-supplement-Supp_Info.pdf [file NIHMS255761-supplement-Supp_Info.pdf]

Supporting Information

© Wiley-VCH 2010

69451 Weinheim, Germany

**RNA Dynamics by Design: Biasing Ensembles Towards the Ligand-Bound State\*\***

*Andrew C. Stelzer, Jeremy D. Kratz, Qi Zhang, and Hashim M. Al-Hashimi\**

anie\_201000814\_sm\_miscellaneous\_information.pdf

|                                                             |            |
|-------------------------------------------------------------|------------|
| <b>I. Supplemental Methods</b> .....                        | <b>S2</b>  |
| a. Sample preparation and resonance assignments.....        | S2         |
| b. RDC measurements and order tensor analysis.....          | S2         |
| c. Measurements of resonance intensities and $K_{ds}$ ..... | S2         |
| <b>II. Supplemental Tables</b> .....                        | <b>S4</b>  |
| a. Table S1.....                                            | S4         |
| b. Table S2.....                                            | S6         |
| <b>III. Supplemental Figures</b> .....                      | <b>S7</b>  |
| a. Figure S1.....                                           | S7         |
| b. Figure S2.....                                           | S8         |
| c. Figure S3.....                                           | S9         |
| d. Figure S4.....                                           | S10        |
| <b>IV. Supplemental References</b> .....                    | <b>S11</b> |

## Supplemental Methods

**Sample preparation and resonance assignments.** Uniformly  $^{13}\text{C}/^{15}\text{N}$  labeled TAR<sup>GC</sup> was prepared by run-off *in-vitro* transcription using synthetic double-stranded DNA containing the T7 promoter and RNA sequence of interest (*Integrated DNA Technologies*). Elongated and non-elongated TAR<sup>GC</sup> constructs were purified by 15% (w/v), and 20% (w/v) denaturing polyacrylamide gel electrophoresis containing 8M urea and 1x TBE, respectively, followed by electroelution in 20 mM Tris pH 8 buffer and EtOH precipitation. The resultant RNA pellet was dissolved and exchanged into NMR buffer (15 mM sodium phosphate, 0.1 mM EDTA, and 25 mM NaCl at pH ~6.4) using a Centricon Ultracel YM-3 concentrator to a final concentration of ~0.5-1.0 mM (Millipore Corp.). All NMR samples contained 10% D<sub>2</sub>O. All experiments were conducted in NMR buffer at 298 K on an Avance Bruker 600 MHz NMR spectrometer equipped with a triple-resonance 5 mm cryogenic probe. The TAR<sup>GC</sup> NMR spectra were assigned using conventional NMR methods employing exchangeable 3D  $^1\text{H}$ - $^{15}\text{N}$  NOESY-HSQC and non-exchangeable 2D  $^1\text{H}$ - $^{13}\text{C}$  NOESY-HSQC, 2D HCN, 2D IP-COSY experiments. Argininamide (ARG, Sigma Aldrich) and Neomycin B (NEOB, MP Biomedicals) titrations were performed by sequentially adding ~2uL of concentrated ARG and NEOB samples to 0.1 mM TAR<sup>GC</sup> and TAR-ARG, up to final ligand concentrations of 2.5 mM and 0.8 mM, respectively. 2D HSQC spectra were collected at each titration point.

**RDC measurements and order tensor analysis.** RDCs were measured in TAR<sup>GC</sup> and EI-TAR<sup>GC</sup> as previously described<sup>[1,2]</sup> using ~7mg/ml and ~23 mg/ml of Pf1 phage order medium<sup>3</sup>, respectively (Table S1). The RDCs measured in the two helices of TAR<sup>GC</sup> were subjected to an order tensor analysis (Table S2).<sup>[4-6]</sup> RDCs measured in E-AU-TAR<sup>GC</sup> and E-GC-TAR<sup>GC</sup> were normalized ( $L=0.66$ ) as previously described<sup>[2]</sup> to take into account differences in the degree of alignment arising from use of a slightly different Pf1 phage concentration. The normalized RDCs measured in each helix were combined in the order tensor analysis. Due to deviations from Watson-Crick geometry, the A22-U40 and terminal G17-C45 base-pairs were excluded from the analysis. The program AFORM-RDC<sup>[6]</sup> was used to estimate errors in the order tensor arising from “structural noise” and RDC measurement uncertainty. A-form helices were constructed using Insight II (Molecular Simulations, Inc), noting that the propeller twist angles had to be corrected from +15° to the standard A-form value of -15°.<sup>[6]</sup>

**Measurements of resonance intensities and  $K_d$ s.** Resonance intensities were measured and normalized to a baseline value of 0.1 as described previously for EI-TAR and EI-TAR-ARG<sup>7</sup>. TAR-ARG Dissociation constants were calculated from the change in weighted average chemical shift for each titration point using the equation<sup>[8]</sup>,

$$\delta_{obs} = \delta_{free} + (\Delta\delta_T) \times \left( \left( [Arg]_T + [RNA]_T + K_d \right) - \frac{\sqrt{\left( [ARG]_T + [RNA]_T + K_d^2 \right) + \left( 4[ARG]_T [RNA] \right)}}{2[RNA]_T} \right),$$

in which  $[ARG]_T$  is the total ARG concentration,  $[RNA]_T$  is the RNA concentration based on UV absorbance at 260 nm,  $\Delta\delta_T$  is the difference in chemical shifts between the free and ligand-associated states (in ppm),  $\delta_{obs}$  is the observed chemical shift (in ppm), and  $\delta_{free}$  is the chemical shift in the free state (in ppm). The data was fit using the Origin software (OriginLab Corporation) in which  $\Delta\delta_T$  and  $K_d$  were allowed to float.

**SUPPLEMENTARY TABLES**

**Table S1.** RDCs measured in EI-TAR<sup>GC</sup>, TAR<sup>GC</sup>-ARG, and TAR<sup>GC</sup>.

| <b>Residue</b> | <b>Bond</b> | <b>EI-TAR<sup>GC</sup></b> | <b>TAR<sup>GC</sup>-ARG</b> | <b>TAR<sup>GC</sup></b> |
|----------------|-------------|----------------------------|-----------------------------|-------------------------|
| G17            | (C8H8)      | 18.0                       | NA                          | -1.3                    |
| G17            | (N1H1)      | -14.6                      | -10.1                       | 0.7                     |
| G17            | (C1'H1')    | NA                         | NA                          | NA                      |
| G18            | (C8H8)      | NA                         | 0.0                         | NA                      |
| G18            | (C1'H1')    | NA                         | NA                          | NA                      |
| G18            | (N1H1)      | -18.5                      | -3.9                        | NA                      |
| C19            | (C5H5)      | NA                         | NA                          | -2.4                    |
| C19            | (C6H6)      | 11.3                       | NA                          | NA                      |
| A20            | (C2H2)      | 25.2                       | 8.4                         | 2.3                     |
| A20            | (C8H8)      | 21.0                       | 30.5                        | 11.7                    |
| A20            | (C1'H1')    | NA                         | NA                          | -19.2                   |
| G21            | (C8H8)      | 24.5                       | 44.7                        | 19.4                    |
| G21            | (C1'H1')    | NA                         | -48.0                       | -17.2                   |
| G21            | (N1H1)      | -20.2                      | -22.8                       | 9.3                     |
| G22            | (C2H2)      | NA                         | NA                          | NA                      |
| G22            | (C8H8)      | 23.8                       | NA                          | 20.9                    |
| G22            | (C1'H1')    | 2.2                        | NA                          | 8.9                     |
| G22            | (N1H1)      | -16.5                      | -18.7                       | 4.5                     |
| U23            | (C5H5)      | NA                         | 37.7                        | -0.9                    |
| U23            | (C6H6)      | 3.6                        | 38.4                        | 5.4                     |
| U23            | (C1'H1')    | -4.5                       | 37.9                        | 0.2                     |
| C24            | (C5H5)      | -3.8                       | -6.5                        | -3.7                    |
| C24            | (C6H6)      | 0.9                        | 6.4                         | 1.9                     |
| C24            | (C1'H1')    | -5.2                       | -10.2                       | -2.9                    |
| U25            | (C5H5)      | -0.5                       | 1.5                         | 0.4                     |
| U25            | (C6H6)      | -1.8                       | -14.8                       | 0.1                     |
| U25            | (C1'H1')    | -2.1                       | -7.3                        | -1.3                    |
| G26            | (C8H8)      | 23.2                       | 26.9                        | 12.4                    |
| G26            | (C1'H1')    | NA                         | NA                          | -10.9                   |
| G26            | (N1H1)      | NA                         | NA                          | 3.2                     |
| A27            | (C2H2)      | 20.7                       | 33.2                        | 12.5                    |
| A27            | (C8H8)      | 20.7                       | 25.2                        | 7.0                     |
| A27            | (C1'H1')    | NA                         | -8.0                        | -6.5                    |
| G28            | (C8H8)      | NA                         | 25.6                        | 8.1                     |
| G28            | (C1'H1')    | NA                         | -13.9                       | -12.0                   |
| G28            | (N1H1)      | NA                         | -18.3                       | 6.4                     |
| C29            | (C5H5)      | NA                         | NA                          | 6.1                     |
| C29            | (C6H6)      | 12.6                       | 37.4                        | 17.7                    |
| C29            | (C1'H1')    | NA                         | NA                          | NA                      |
| U31            | (C5H5)      | 18.0                       | 31.3                        | 14.3                    |
| U31            | (C6H6)      | 19.9                       | 31.2                        | 16.9                    |
| U31            | (C1'H1')    | -13.7                      | -21.5                       | -8.8                    |
| U32            | (C5H5)      | NA                         | 25.4                        | 10.4                    |
| U32            | (C6H6)      | 12.1                       | 15.3                        | 2.9                     |
| U32            | (C1'H1')    | 19.2                       | 25.2                        | 9.0                     |
| C33            | (C5H5)      | 6.0                        | -6.1                        | 1.0                     |
| C33            | (C6H6)      | 13.2                       | 12.1                        | 4.1                     |
| C33            | (C1'H1')    | 1.0                        | -33.6                       | -8.5                    |
| G34            | (C8H8)      | 22.6                       | 24.1                        | 7.7                     |

|      |          |       |       |       |
|------|----------|-------|-------|-------|
| G34  | (C1'H1') | 20.1  | 11.6  | 5.2   |
| G34  | (N1H1)   | -24.9 | NA    | 7.1   |
| G36  | (C8H8)   | 25.7  | 46.6  | 21.5  |
| G36  | (C1'H1') | -11.2 | NA    | NA    |
| G36  | (N1H1)   | NA    | -21.5 | 7.8   |
| C37  | (C5H5)   | 20.8  | NA    | 20.7  |
| C37  | (C6H6)   | 14.0  | NA    | NA    |
| C37  | (C1'H1') | NA    | NA    | -8.0  |
| U38  | (C5H5)   | 23.2  | NA    | 18.8  |
| U38  | (C6H6)   | NA    | 23.7  | 7.1   |
| U38  | (C1'H1') | -13.2 | -20.2 | -9.3  |
| U38  | (N3H3)   | -11.1 | -11.4 | 4.3   |
| C39  | (C5H5)   | NA    | NA    | 13.0  |
| C39  | (C6H6)   | 14.6  | NA    | 13.5  |
| C39  | (C1'H1') | NA    | -38.5 | NA    |
| C40  | C6H6     | 15.9  | NA    | 19.2  |
| C40  | (C5H5)   | NA    | NA    | 9.6   |
| C40  | (C1'H1') | NA    | NA    | -13.1 |
| C41  | (C5H5)   | 22.6  | NA    | 10.9  |
| C41  | (C6H6)   | NA    | NA    | NA    |
| U42  | (C5H5)   | 22.4  | 37.7  | 16.7  |
| U42  | (C1'H1') | NA    | -7.3  | NA    |
| U42  | (N3H3)   | -14.5 | -17.5 | 6.4   |
| G43  | (C8H8)   | 15.1  | 26.9  | 14.5  |
| G43  | (C1'H1') | NA    | NA    | NA    |
| G43  | (N1H1)   | NA    | -7.2  | -2.0  |
| C44  | (C6H6)   | NA    | NA    | -2.7  |
| C44  | (C5H5)   | NA    | NA    | 18.5  |
| C45  | (C6H6)   | NA    | NA    | -0.9  |
| C45  | (C5H5)   | NA    | 17.8  | 6.7   |
| C45  | (C1'H1') | NA    | -16.6 | -6.7  |
| G-21 | (C8H8)   | 19.6  | NA    | NA    |
| C+21 | (C5H5)   | 21.8  | NA    | NA    |

**Table S2.** Statistics for order tensor analysis of RDCs measured in the helices of EI-TAR<sup>GC</sup> and TAR<sup>GC</sup>-ARG using idealized A-form helices as input coordinates. Shown are the number of RDCs ( $N$ ) used in the order tensor determination, the root-mean-square deviation (RMSD) and correlation coefficient ( $R$ ) between measured and back-predicted values, asymmetry parameter ( $\eta$ ), generalized degree of order ( $\vartheta$ ), internal generalized degree of order ( $\vartheta_{\text{int}}$ ), and inter-helical bend angle ( $\beta$ ). Errors in  $\vartheta$ ,  $\vartheta_{\text{int}}$ ,  $\eta$ , and  $\beta$  are obtained using the program AFORM-RDC and take into account both RDC measurement uncertainty and local structural noise in the idealized A-form helix.<sup>[6]</sup>

|                            | Helix | $N$ | RMSD<br>(Hz) | $R$  | $\eta$    | $\vartheta(\times 10^{-3})$ | $\vartheta_{\text{int}}$ | $\beta^\circ$ |
|----------------------------|-------|-----|--------------|------|-----------|-----------------------------|--------------------------|---------------|
| E-TAR <sup>GC</sup>        | I     | 19  | 4.1          | 0.98 | 0.19±0.08 | 1.04±0.04                   | 1.02±0.1                 | 11.9±6.5      |
|                            | II    | 12  | 3.2          | 0.98 | 0.16±0.10 | 1.06±0.10                   |                          |               |
| TAR <sup>GC</sup> -<br>ARG | I     | 13  | 1.9          | 0.99 | 0.36±0.21 | 1.89±0.21                   | 0.88±0.14                | 17.7±6.0      |
|                            | II    | 14  | 4            | 0.99 | 0.26±0.17 | 2.15±0.20                   |                          |               |

SUPPLEMENTARY FIGURES

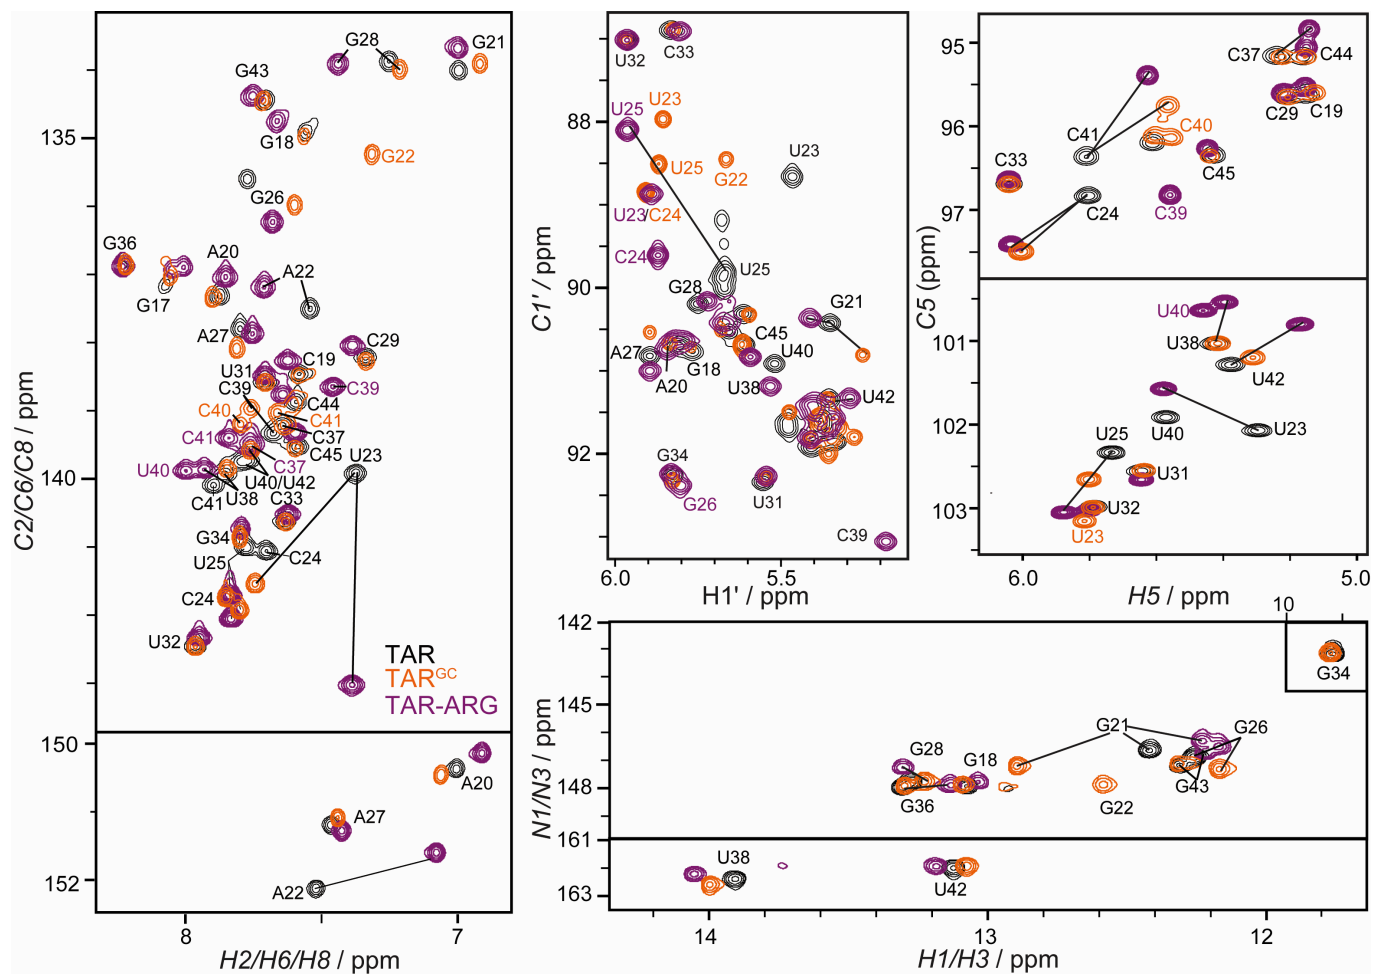

Figure S1. 2D CH and NH HSQC spectra of TAR (black), TAR<sup>GC</sup> (orange) and TAR-ARG (purple)



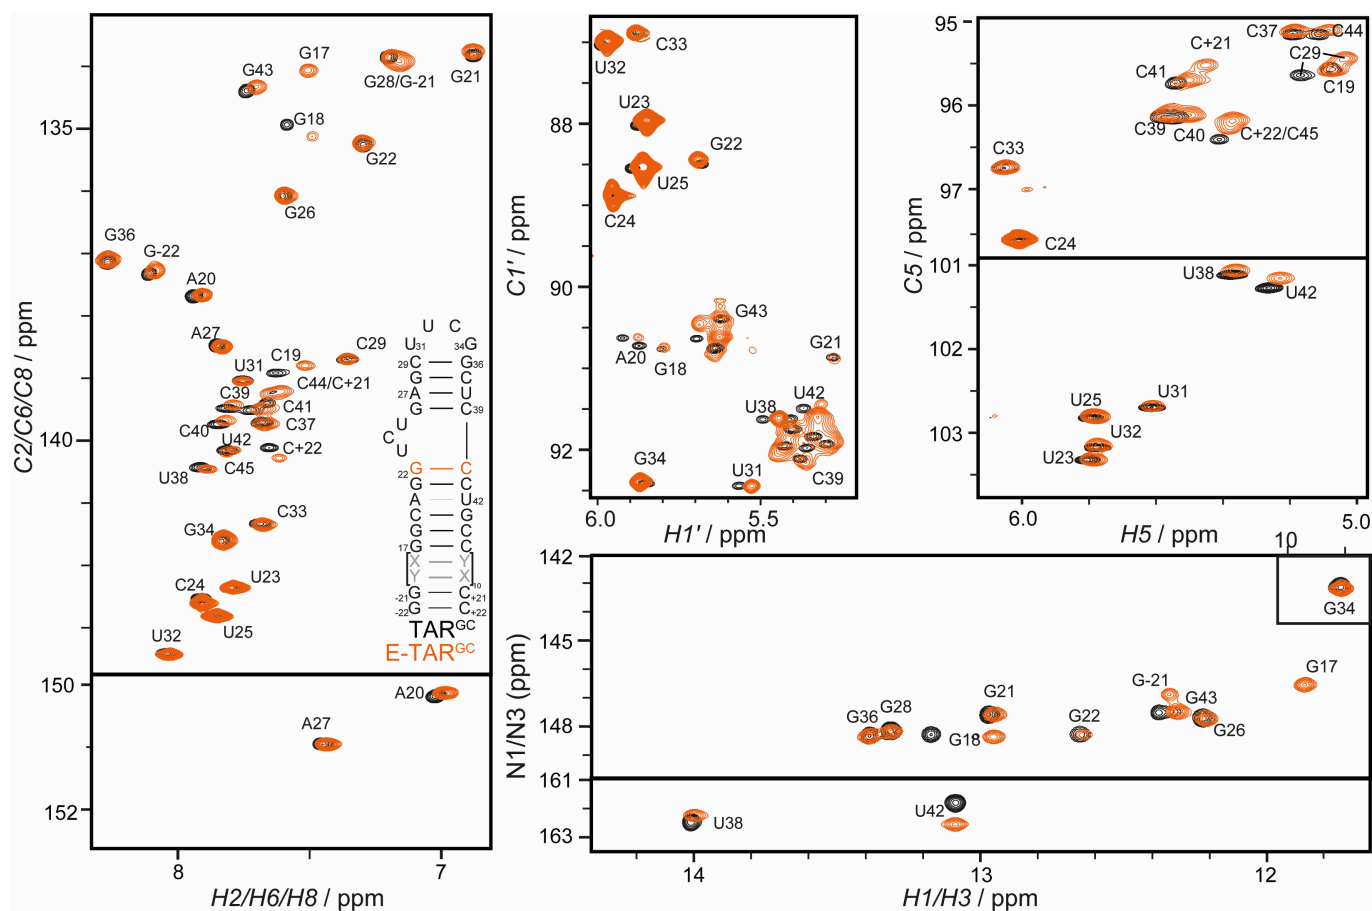

**Figure S2.** 2D CH and NH HSQC spectra of TAR<sup>GC</sup> (black) and EI-TAR<sup>GC</sup> (orange) demonstrating that elongation does not affect the structural and dynamical integrity of TAR<sup>GC</sup>. Significant perturbations are primarily localized at residues near the site of elongation.

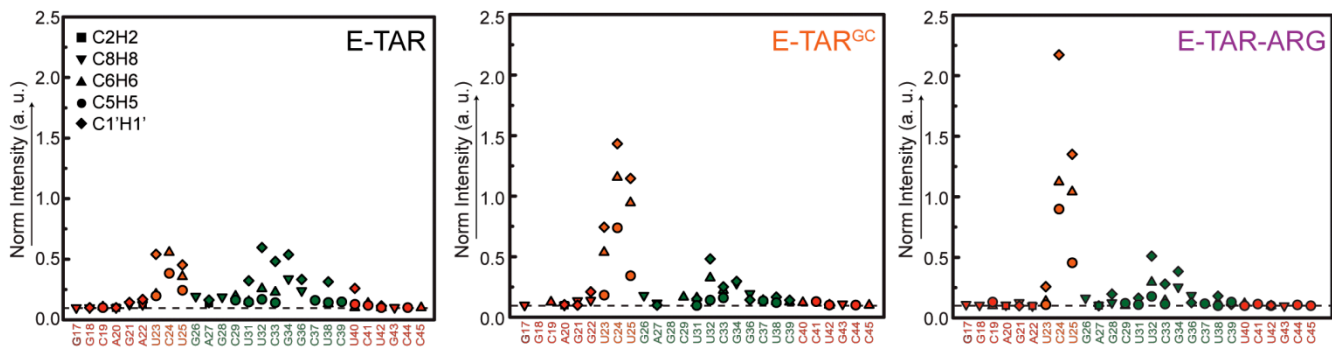

**Figure S3.** Normalized resonance intensities measured in 2D HSQC spectra of EI-TAR, EI-TAR-ARG, and EI-TAR<sup>GC</sup>. Residues in helix I, helix II, and the bulge are colored-coded red, green, and orange respectively.



## SUPPLEMENTARY REFERENCES

1. S. W. Pitt, A. Majumdar, A. Serganov, D. J. Patel, H. M. Al-Hashimi, *J. Mol. Biol.* **2004**, 338, 7-16.
2. Q. Zhang, A. C. Stelzer, C. K. Fisher, H. M. Al-Hashimi, *Nature* **2007**, 450, 1263-7.
3. M. R. Hansen, P. Hanson, A. Pardi, *Method Enzymol.* **2000**, 317, 220-240.
4. J. A. Losonczy, M. Andrec, M. W. F. Fischer, J. H. Prestegard, *J. Magn. Reson.* **1999**, 138, 334-342.
5. M. H. Bailor, C. Musselman, A. L. Hansen, K. Gulati, D. J. Patel, H. M. Al-Hashimi, *Nat. Protoc.* **2007**, 2, 1536-46.
6. C. Musselman, S. W. Pitt, K. Gulati, L. L. Foster, I. Andricioaei, H. M. Al-Hashimi, *J. Biomol. NMR* **2006**, 36, 235-49.
7. Q. Zhang, X. Sun, E. D. Watt, H. M. Al-Hashimi, *Science* **2006**, 311, 653-6.
8. E. R. P. Zuiderweg, *Biochemistry* **2002**, 41, 1-7.
